# Supplementary material for: Ambient electrochemical N2-to-NH3 conversion catalyzed by TiO2 decorated juncus effusus-derived carbon microtubes
Source: Royal Society of Chemistry journal article supplement (doi:10.1039/d2qi00140c), 2022-01-01
Supplement: d2qi00140c1.pdf [file d2qi00140c1.pdf]

## Electronic Supplementary Information

### Experimental section

**Materials:** *Juncus effusus* fibers were purchased from Jiangxi *Juncus effusus* Co., Ltd., Jiangxi, China. Tetrabutyl titanate ( $C_{16}H_{36}O_4Ti$ , TBT), acetic acid ( $CH_3COOH$ ), sodium sulfate anhydrous ( $Na_2SO_4$ ), hydrochloric acid (HCl), ammonium chloride ( $NH_4Cl$ ), sodium hypochlorite ( $NaClO$ ), sodium hydroxide (NaOH), sodium salicylate ( $C_7H_5O_3Na$ ), sodium nitroferricyanide (III) dihydrate ( $Na_2Fe(CN)_5NO \cdot 2H_2O$ ), para-(dimethylamino) benzaldehyde ( $C_9H_{11}NO$ ), and Nafion solution (5 wt%) were purchased from Aladdin Co., Ltd. (Shanghai, China). Absolute ethanol ( $C_2H_5OH$ ), and hydrazine hydrate ( $N_2H_4 \cdot H_2O$ ) were purchased from Beijing Chemical Corporation. Carbon paper was purchased from Taiwan CeTech Company. The deionized water used throughout all experiments was purified by a Millipore system. All chemical reagents were used as purchased without further purification.

**Preparation of  $TiO_2/$ JE-CMTs hybrid:** Firstly, the *juncus effusus* (designated as JE) fibers were washed with ethanol and deionized water, and then dried at 60 °C. Subsequently, 20 mL of ethanol, 2 mL of acetic acid, and 3 g of  $C_{16}H_{36}O_4Ti$  were mixed to form a homogeneous solution, followed by 0.15 g of pretreated JE was directly immersed into the mixture and dried at 60 °C overnight. After the evaporation of ethanol, the JE was treated at 800 °C in an argon atmosphere for 2 h at a heating rate of 2 °C  $min^{-1}$ . After cooling to room temperature naturally, the resulting product was immersed in a 2 M HCl solution for 24 h, and washed repeatedly with deionized

water until pH = 7 to remove metal residues. Finally, it was dried in a vacuum at 60 °C and designated as TiO<sub>2</sub>/JE-CMTs. For comparison, pure TiO<sub>2</sub> power was prepared via a similar procedure without the presence of JE. In addition, the control sample JE-CMTs was directly obtained through the same calcination conditions.

**Preparation of TiO<sub>2</sub>/JE-CMTs/CP:** Typically, 10 mg of catalyst and 40 μL of the 5 wt% Nafion solution were dispersed in 720 μL of absolute ethanol and 240 μL of deionized water by sonicating for 1 h to form a uniform ink. Then 10 μL of the above dispersion was loaded onto a 1 cm<sup>2</sup> carbon paper (CP) and dried under ambient conditions.

**Characterizations:** X-ray powder diffraction (XRD) patterns were collected on a Shimadzu XRD-6100 diffractometer (Shimadzu, Japan) with a Cu Kα X-ray source. Scanning electron microscopy (SEM) images and corresponding energy-dispersive X-ray (EDX) elemental mapping images were collected on a GeminiSEM 300 scanning electron microscope (ZEISS, Germany) at an accelerating voltage of 5 kV. Transmission electron microscopy (TEM) images were conducted on a Zeiss Libra 200FE transmission electron microscope at an acceleration voltage of 200 kV. Raman spectra are obtained by a LabRAM HR Evolution Raman spectroscopy. X-ray photoelectron spectroscopy (XPS) measurements were carried out on an ESCALAB 250Xi spectrometer equipped with monochromatized Al Kα radiation. Nitrogen adsorption-desorption isotherms of TiO<sub>2</sub>/JE-CMTs were performed on a Micromeritics Instrument Corporation ASAP 2460 surface area analyzer at 77 K. The

specific surface area was measured by Brunauer-Emmett-Teller (BET) analysis, and the pore size distribution was obtained by the Barrett-Joyner-Halenda (BJH) method. Thermogravimetric analysis (TGA) was performed on a Perkin-Elmer Model Pyris1 TGA apparatus from 25 to 800 °C at a heating rate of 10 °C min<sup>-1</sup> in air. UV-vis spectroscopy measurements were performed on a Shimadzu UV-1800 UV-vis spectrophotometer. The ion chromatography (IC) data were obtained by using a ThermoFisher ICS 5000 plus IC.

**Electrochemical measurements:** The electrochemical measurements were carried out in a gastight H-type cell separated by a Nafion 211 membrane using a three-electrode configuration. Before NRR tests, the Nafion membrane was pretreated by heating in the 3% H<sub>2</sub>O<sub>2</sub> solution and 0.5 M H<sub>2</sub>SO<sub>4</sub> at 80 °C for 1 h, respectively, and then washing with ultrapure water for another 1 h. We used a CHI760E electrochemical workstation (Shanghai, Chenhua) to conduct electrochemical experiments. In this work, the obtained TiO<sub>2</sub>/JE-CMTs/CP, Ag/AgCl/saturated KCl, and graphite rod were used as the working electrode, reference electrode, and counter electrode, respectively. All potentials were converted to the reversible hydrogen electrode (RHE) through calibration ( $E$  (vs RHE) =  $E$  (vs Ag/AgCl) + 0.197 V + 0.059 × pH). For N<sub>2</sub> reduction experiments, chronoamperometric tests were conducted in N<sub>2</sub>-saturated 0.1 M Na<sub>2</sub>SO<sub>4</sub> electrolyte (the Na<sub>2</sub>SO<sub>4</sub> electrolyte was purged with N<sub>2</sub> for 30 min before the measurement).

**Determination of NH<sub>3</sub>:** Concentration of produced NH<sub>3</sub> was spectrophotometrically

determined by the indophenol blue method. In detail, 4 mL of the electrolyte from the cathodic chamber was mixed with 50  $\mu\text{L}$  oxidizing solution ( $\rho_{\text{Cl}} = 4 - 4.9$  NaClO and 0.75 M NaOH), 500  $\mu\text{L}$  coloring solution (0.4 M  $\text{C}_7\text{H}_6\text{O}_3\text{Na}$  and 0.32 M NaOH), and 50  $\mu\text{L}$  catalyst solution (1 wt%  $\text{Na}_2[\text{Fe}(\text{CN})_5\text{NO}] \cdot 2\text{H}_2\text{O}$ ) for 1 h. Absorbance measurements were performed from 500 nm to 800 nm. The concentration-absorbance (at 655 nm) curves were calibrated using standard  $\text{NH}_4^+$  solution with a series of known concentrations. The fitting curve ( $y = 0.617x + 0.0135$ ,  $R^2 = 0.993$ ) shows a good linear relation of absorbance value with  $\text{NH}_4^+$  concentration.

**Determination of  $\text{N}_2\text{H}_4$ :** The  $\text{N}_2\text{H}_4$  content in the electrolyte was determined by the method of Watt and Chrisp. The mixture of p- $\text{C}_9\text{H}_{11}\text{NO}$  (5.99 g), HCl (30 mL), and  $\text{C}_2\text{H}_5\text{OH}$  (300 mL) was used as a color reagent. Typically, 2 mL of electrolyte was removed from the cathodic chamber and mixed with 2 mL above prepared color reagent. After standing for 10 min at room temperature, the UV-vis absorption spectra were collected at a wavelength of 455 nm. The fitting curve ( $y = 0.4788x + 0.0471$ ,  $R^2 = 0.999$ ) shows a good linear relation of absorbance value with  $\text{N}_2\text{H}_4$  concentration.

**Calculations of  $\text{NH}_3$  yield and Faradaic efficiency (FE):**

$\text{NH}_3$  yield ( $V_{\text{NH}_3}$ ) was calculated by the following equation:

$$V_{\text{NH}_3} = c(\text{NH}_3) \times V / (t \times m_{\text{cat}}) \quad (1)$$

The amount of  $\text{NH}_3$  was calculated as follows:

$$m_{\text{NH}_3} = c(\text{NH}_3) \times V \quad (2)$$

FE was calculated according to the following equation:

$$FE = 3F \times c(\text{NH}_3) \times V / (17 \times Q) \times 100\% \quad (3)$$

Where  $c(\text{NH}_3)$  is the measured  $\text{NH}_3$  concentration,  $V$  is the volume of the cathodic reaction electrolyte (35 mL),  $t$  is the reduction time (2 h),  $m_{cat}$  is the mass loading of the catalyst on CP (0.1 mg),  $F$  is the Faraday constant ( $96500 \text{ C mol}^{-1}$ ), and  $Q$  is the total quantity of applied electricity.

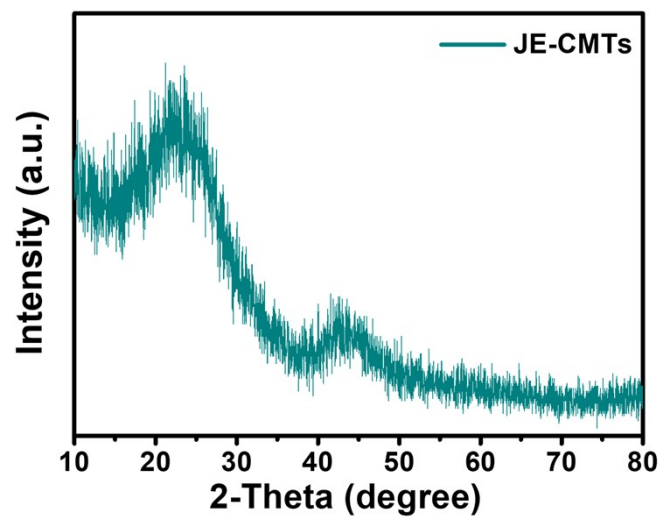

Fig. S1. XRD pattern of JE-CMTs.

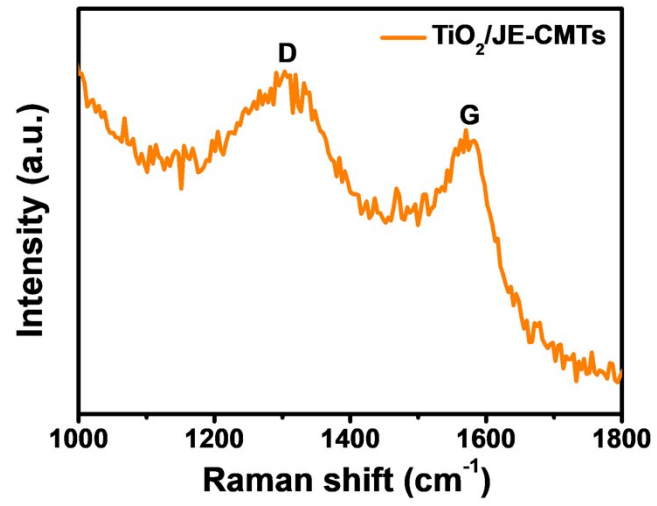

Fig. S2. Raman spectrum of TiO<sub>2</sub>/JE-CMTs.

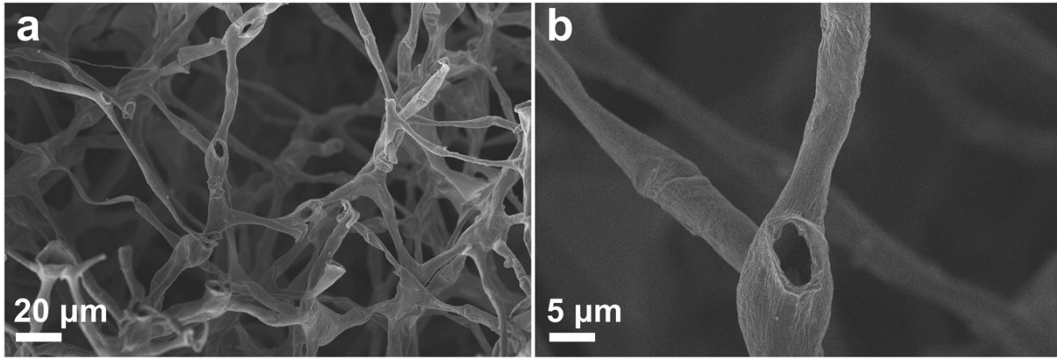

**Fig. S3.** SEM images of JE-CMTs with different magnifications.



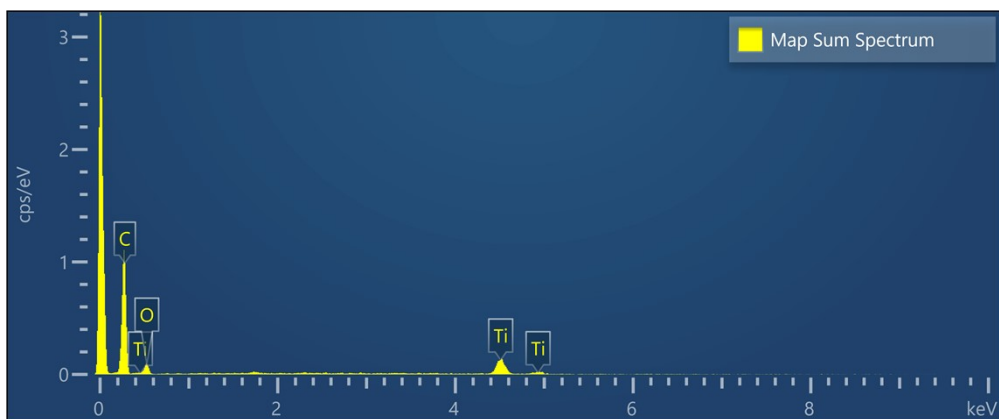

**Fig. S4.** EDX spectrum of  $\text{TiO}_2/\text{JE-CMTs}$ .

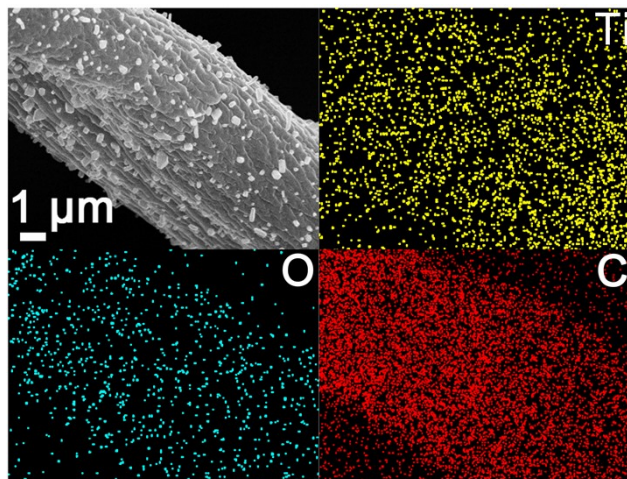

**Fig. S5.** SEM image and EDX elemental mapping images of Ti, O, and C elements of  $\text{TiO}_2/\text{JE-CMTs}$ .

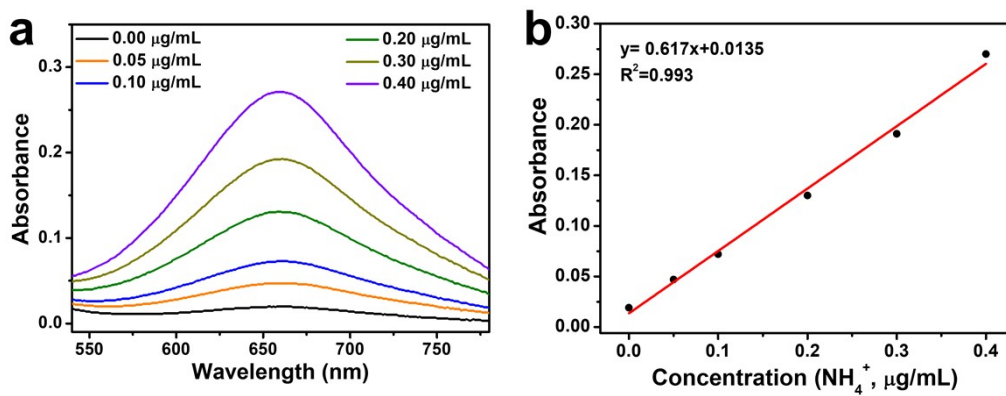

**Fig. S6.** (a) UV-vis absorption spectra of indophenol assays with  $\text{NH}_4^+$  concentrations after incubated for 1 h at room temperature. (b) Calibration curve used for calculation of  $\text{NH}_4^+$  concentrations.

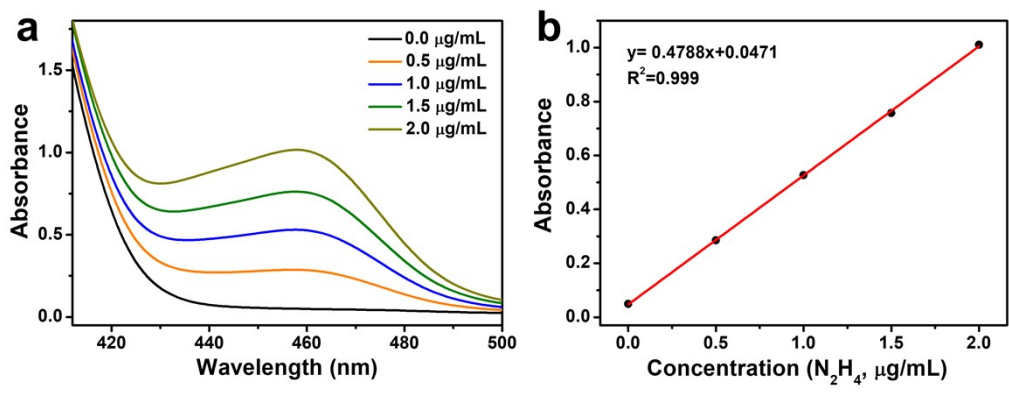

**Fig. S7.** (a) UV-vis absorption spectra of various  $N_2H_4$  concentrations after incubated for 10 min at room temperature. (b) Calibration curve used for calculation of  $N_2H_4$  concentrations.

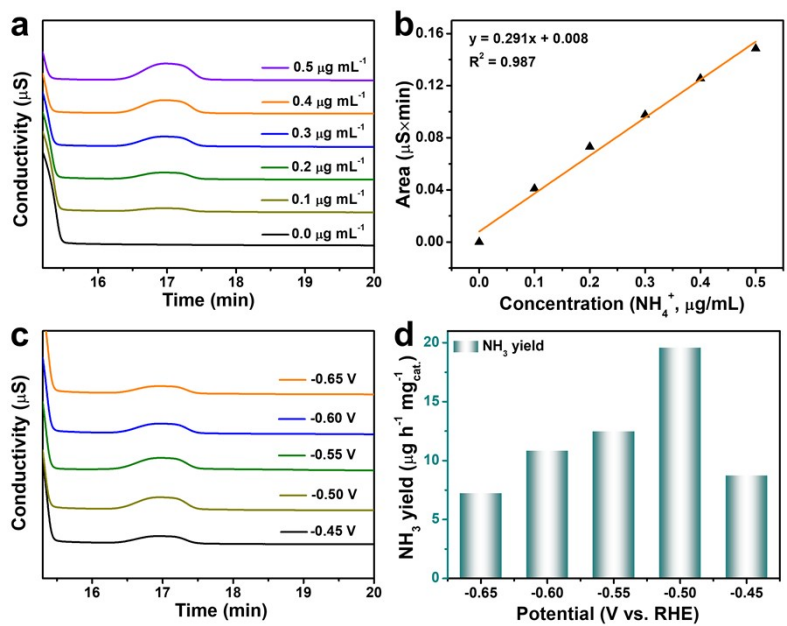

**Fig. S8.** (a) Ion chromatogram curves of the standard solution with  $\text{NH}_4^+$  concentrations in 0.1 M  $\text{Na}_2\text{SO}_4$ . (b) Calibration curve used for estimation of  $\text{NH}_4^+$ . (c) Ion chromatogram for the electrolytes at a series of potentials after electrolysis for 2 h. (d)  $\text{NH}_3$  yields of  $\text{TiO}_2/\text{JE-CMTs}/\text{CP}$  at corresponding potentials.

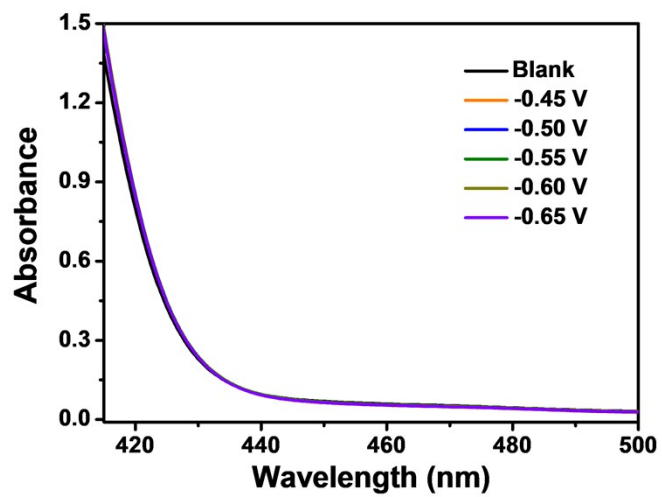

**Fig. S9.** UV-vis absorption spectra of the electrolytes detected by the method of Watt and Chrisp after 2 h electrolysis in  $N_2$  atmosphere at a series of potentials.

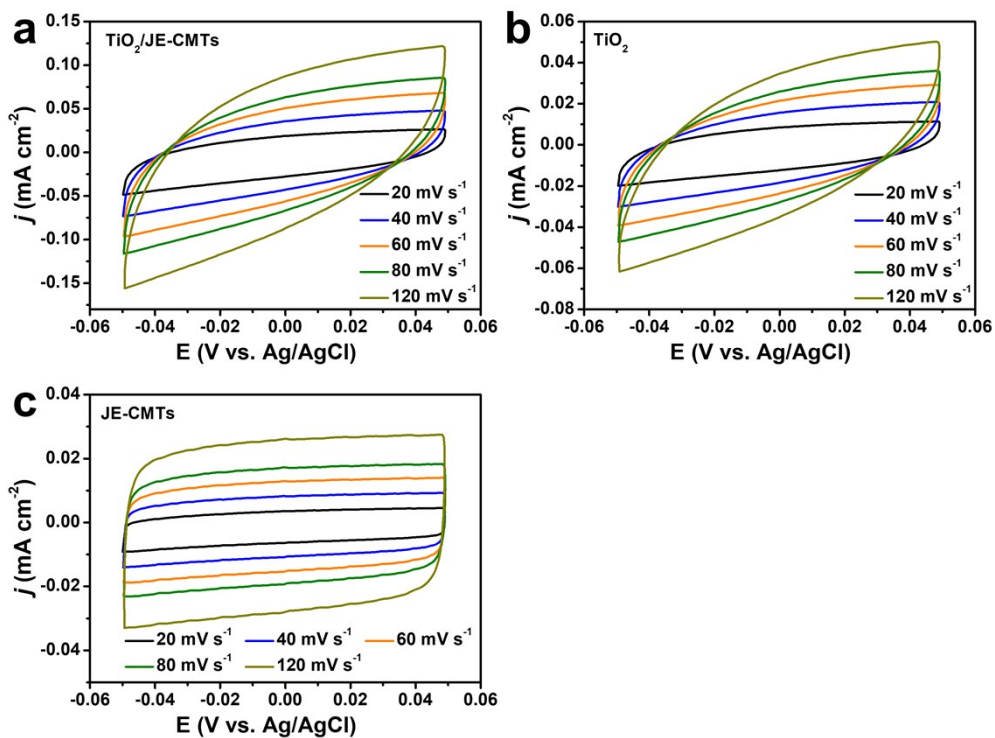

**Fig. S10.** Cyclic voltammetry curves of (a)  $\text{TiO}_2/\text{JE-CMTs}/\text{CP}$ , (b)  $\text{TiO}_2/\text{CP}$ , and (c)  $\text{JE-CMTs}/\text{CP}$  with various scan rates ( $20\text{--}120\text{ mV s}^{-1}$ ) in the region of  $-0.05$  to  $0.05$  V vs Ag/AgCl.

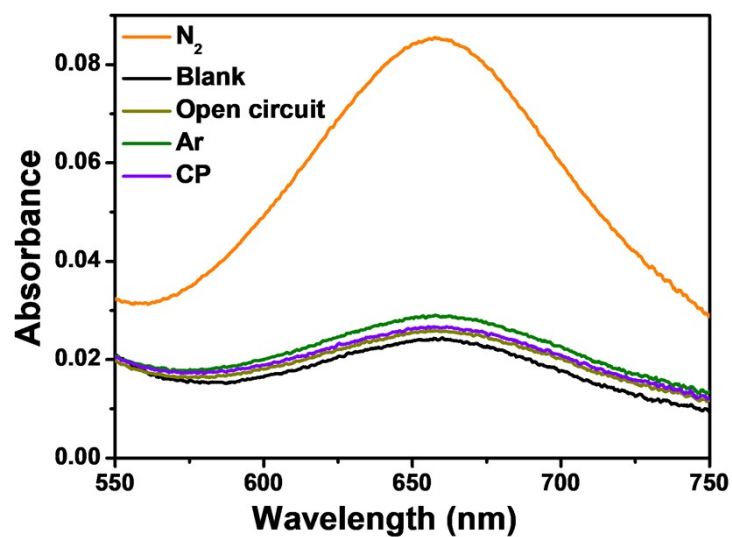

**Fig. S11.** UV-vis absorption spectra of the electrolytes stained with indophenol indicator for the TiO<sub>2</sub>/JE-CMTs/CP electrode after 2 h electrolysis at  $-0.50$  V under different electrochemical conditions.



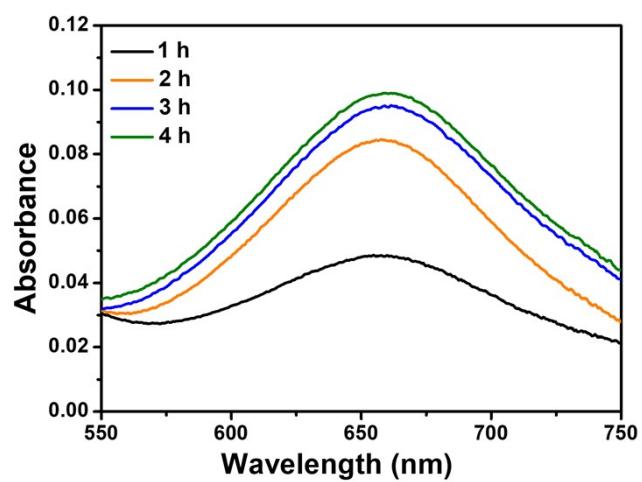

**Fig. S12.** UV-vis spectra of the electrolytes with different electrolysis time at  $-0.50$  V on the  $\text{TiO}_2/\text{JE-CMTs}/\text{CP}$ .

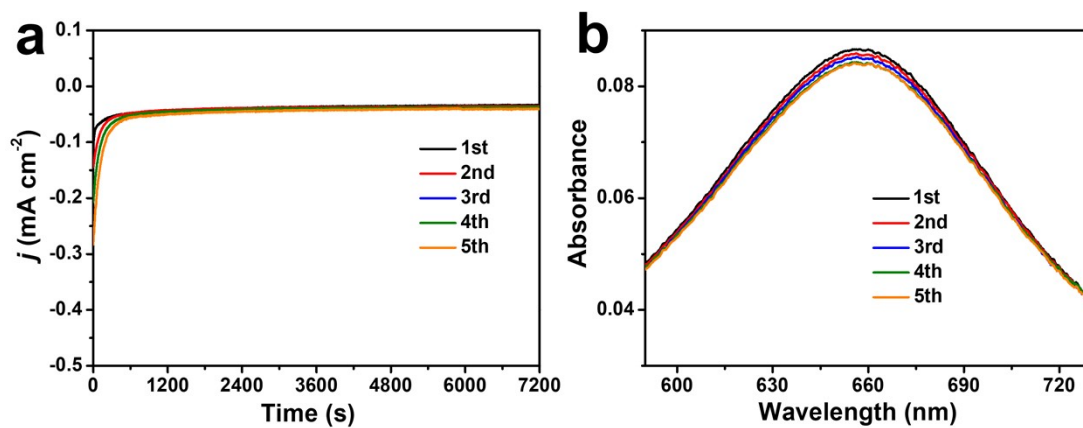

**Fig. S13.** (a) Chronoamperometry curves of TiO<sub>2</sub>/JE-CMTs/CP at -0.50 V in 0.1 M Na<sub>2</sub>SO<sub>4</sub> for continuous cycles. (b) UV-vis absorption spectra of the electrolytes stained with indophenol indicator after NRR electrolysis.

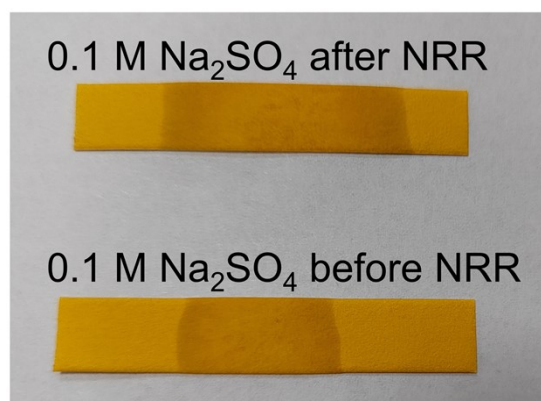

**Fig. S14.** Photographs of pH test strips in 0.1 M Na<sub>2</sub>SO<sub>4</sub> before and after 36-h electrolysis.

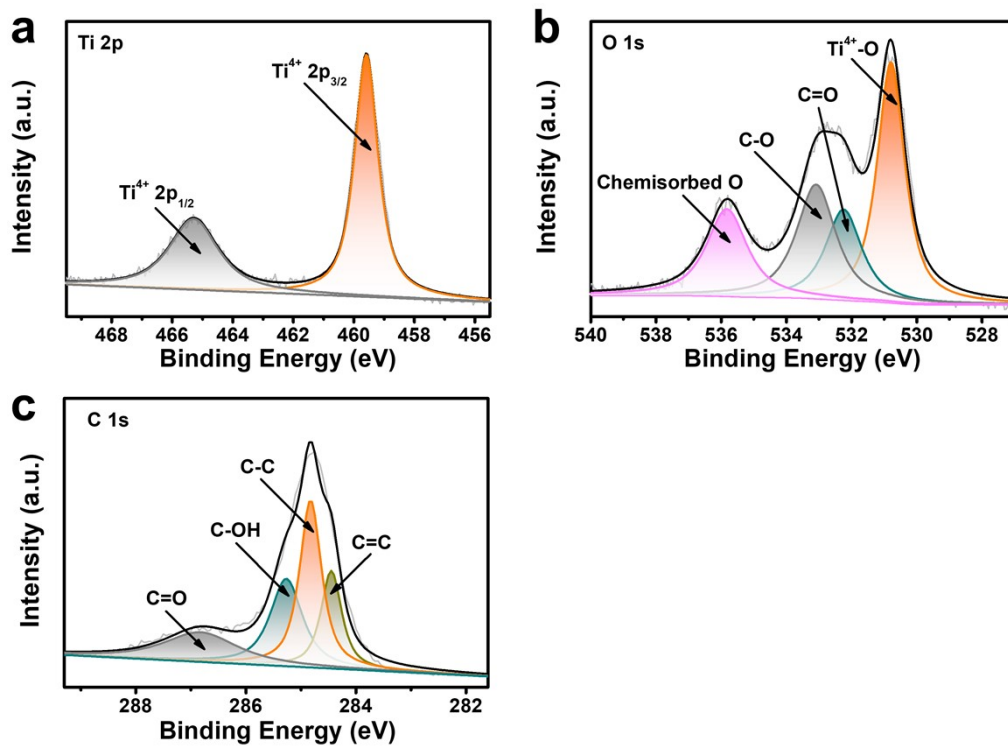

**Fig. S15.** XPS spectra of  $\text{TiO}_2/\text{JE-CMTs/CP}$  after long-term NRR electrolysis.

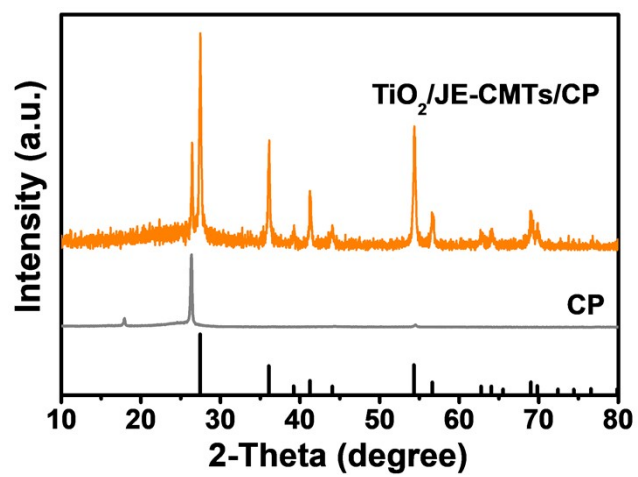

**Fig. S16.** XRD pattern for  $\text{TiO}_2/\text{JE-CMTs}/\text{CP}$  after long-term NRR electrolysis.

**Table S1.** Comparison of the electrocatalytic NRR performances of TiO<sub>2</sub>/JE-CMTs

with other reported Ti- and carbon-based NRR catalysts under ambient conditions.

| Catalysts                                | Electrolyte                            | NH <sub>3</sub> yield                                       | FE (%) | Ref.      |
|------------------------------------------|----------------------------------------|-------------------------------------------------------------|--------|-----------|
| TiO <sub>2</sub> /JE-CMTs                | 0.1 M Na <sub>2</sub> SO <sub>4</sub>  | 20.03 μg h <sup>-1</sup> mg <sup>-1</sup> <sub>cat.</sub>   | 10.76  | This work |
| C-doped TiO <sub>2</sub>                 | 0.1 M Na <sub>2</sub> SO <sub>4</sub>  | 16.22 μg h <sup>-1</sup> mg <sup>-1</sup> <sub>cat.</sub>   | 1.84   | 1         |
| B-doped TiO <sub>2</sub>                 | 0.1 M Na <sub>2</sub> SO <sub>4</sub>  | 14.4 μg h <sup>-1</sup> mg <sup>-1</sup> <sub>cat.</sub>    | 3.4    | 2         |
| V-TiO <sub>2</sub>                       | 0.5 M LiClO <sub>4</sub>               | 17.73 μg h <sup>-1</sup> mg <sup>-1</sup> <sub>cat.</sub>   | 15.3   | 3         |
| TiO <sub>2</sub> /Ti                     | 0.1 M Na <sub>2</sub> SO <sub>4</sub>  | 5.6 μg h <sup>-1</sup> mg <sup>-1</sup> <sub>cat.</sub>     | 2.5    | 4         |
| Ti <sup>3+</sup> -TiO <sub>2-x</sub> /TM | 0.1 M Na <sub>2</sub> SO <sub>4</sub>  | 3.51×10 <sup>-10</sup> mol s <sup>-1</sup> cm <sup>-2</sup> | 14.62  | 5         |
| d-TiO <sub>2</sub> /TM                   | 0.1 M HCl                              | 1.24×10 <sup>-10</sup> mol s <sup>-1</sup> cm <sup>-2</sup> | 9.17   | 6         |
| Y-TiO <sub>2</sub> -C                    | 0.1 M HCl                              | 6.3 μg h <sup>-1</sup> mg <sup>-1</sup> <sub>cat.</sub>     | 11.0   | 7         |
| TiO <sub>2</sub> -rGO                    | 0.1 M Na <sub>2</sub> SO <sub>4</sub>  | 15.13 μg h <sup>-1</sup> mg <sup>-1</sup> <sub>cat.</sub>   | 3.3    | 8         |
| C-Ti <sub>x</sub> O <sub>y</sub> /C      | 0.1 M Li <sub>2</sub> SO <sub>4</sub>  | 14.8 μg h <sup>-1</sup> mg <sup>-1</sup> <sub>cat.</sub>    | 17.8   | 9         |
| TiC/C NF                                 | 0.1 M HCl                              | 14.1 μg h <sup>-1</sup> mg <sup>-1</sup> <sub>cat.</sub>    | 5.8    | 10        |
| TiB <sub>2</sub> thin film               | 0.1 M HCl                              | 1.75×10 <sup>-10</sup> mol s <sup>-1</sup> cm <sup>-2</sup> | 11.37  | 11        |
| Zr-doped TiO <sub>2</sub>                | 1.0 M KOH                              | 8.9 μg h <sup>-1</sup> cm <sup>-2</sup>                     | 17.3   | 12        |
| Oxygen-doped hollow carbon microtubes    | 0.1 M HCl                              | 25.12 μg h <sup>-1</sup> mg <sup>-1</sup> <sub>cat.</sub>   | 9.1    | 13        |
| Reduced graphene oxide                   | 0.5 M LiClO <sub>4</sub>               | 17.02 μg h <sup>-1</sup> mg <sup>-1</sup> <sub>cat.</sub>   | 4.83   | 14        |
| Nitrogen-doped porous carbon             | 0.005 M H <sub>2</sub> SO <sub>4</sub> | 1.31 mmol h <sup>-1</sup> g <sup>-1</sup> <sub>cat.</sub>   | 9.98   | 15        |
| S-doped carbon nanosphere                | 0.1 M Na <sub>2</sub> SO <sub>4</sub>  | 19.07 μg h <sup>-1</sup> mg <sup>-1</sup> <sub>cat.</sub>   | 7.47   | 16        |
| Co/nitrogen-doped carbon                 | 0.1 M KOH                              | 5.1 μg h <sup>-1</sup> mg <sup>-1</sup> <sub>cat.</sub>     | 10.1   | 17        |
| Fe-N, P co-doped porous carbon           | 0.1 M NaOH                             | 4.36 μg h <sup>-1</sup> mg <sup>-1</sup> <sub>cat.</sub>    | 5.3    | 18        |

## References

- 1 K. Jia, Y. Wang, Q. Pan, B. Zhong, Y. Luo, G. Cui, X. Guo and X. Sun, Enabling the electrocatalytic fixation of  $N_2$  to  $NH_3$  by C-doped  $TiO_2$  nanoparticles under ambient conditions, *Nanoscale Adv.*, 2019, **1**, 961–964.
- 2 Y. Wang, K. Jia, Q. Pan, Y. Xu, Q. Liu, G. Cui, X. Guo and X. Sun, Boron-doped  $TiO_2$  for efficient electrocatalytic  $N_2$  fixation to  $NH_3$  at ambient conditions, *ACS Sustainable Chem. Eng.*, 2018, **7**, 117–122.
- 3 T. Wu, W. Kong, Y. Zhang, Z. Xing, J. Zhao, T. Wang, X. Shi, Y. Luo and X. Sun, Greatly enhanced electrocatalytic  $N_2$  reduction on  $TiO_2$  via V doping, *Small Methods*, 2019, **3**, 1900356.
- 4 R. Zhang, X. Ren, X. Shi, F. Xie, B. Zheng, X. Guo and X. Sun, Enabling effective electrocatalytic  $N_2$  conversion to  $NH_3$  by the  $TiO_2$  nanosheets array under ambient conditions, *ACS Appl. Mater. Interfaces*, 2018, **10**, 28251–28255.
- 5 B. Li, X. Zhu, J. Wang, R. Xing, Q. Liu, X. Shi, Y. Luo, S. Liu, X. Niu and X. Sun,  $Ti^{3+}$  self-doped  $TiO_{2-x}$  nanowires for efficient electrocatalytic  $N_2$  reduction to  $NH_3$ , *Chem. Commun.*, 2020, **56**, 1074–1077.
- 6 L. Yang, T. Wu, R. Zhang, H. Zhou, L. Xia, X. Shi, H. Zheng, Y. Zhang and X. Sun, Insights into defective  $TiO_2$  in electrocatalytic  $N_2$  reduction: combining theoretical and experimental studies, *Nanoscale*, 2019, **11**, 1555–1562.

- 7 L. Yang, C. Choi, S. Hong, Z. Liu, Z. Zhao, M. Yang, H. Shen, A. W. Robertson, H. Zhang and T. W. B. Lo, Single yttrium sites on carbon-coated TiO<sub>2</sub> for efficient electrocatalytic N<sub>2</sub> reduction, *Chem. Commun.*, 2020, **56**, 10910–10913.
- 8 X. Zhang, Q. Liu, X. Shi, A. M. Asiri, Y. Luo, X. Sun and T. Li, TiO<sub>2</sub> nanoparticles–reduced graphene oxide hybrid: an efficient and durable electrocatalyst toward artificial N<sub>2</sub> fixation to NH<sub>3</sub> under ambient conditions, *J. Mater. Chem. A*, 2018, **6**, 17303–17306.
- 9 Q. Qin, Y. Zhao, M. Schmallegger, T. Heil, J. Schmidt, R. Walczak, G. Gescheidt-Demner, H. Jiao and M. Oschatz, Enhanced electrocatalytic N<sub>2</sub> reduction via partial anion substitution in titanium oxide–carbon composites, *Angew. Chem., Int. Ed.*, 2019, **58**, 13101–13106.
- 10 G. Yu, H. Guo, W. Kong, T. Wang, Y. Luo, X. Shi, A. M. Asiri, T. Li and X. Sun, Electrospun TiC/C nanofibers for ambient electrocatalytic N<sub>2</sub> reduction, *J. Mater. Chem. A*, 2019, **7**, 19657–19661.
- 11 S. Li, Y. Wang, J. Liang, T. Xu, D. Ma, Q. Liu, T. Li, S. Xu, G. Chen, A. M. Asiri, Y. Luo, Q. Wu and X. Sun, TiB<sub>2</sub> thin film enabled efficient NH<sub>3</sub> electrosynthesis at ambient conditions, *Mater. Today Phys.*, 2021, **18**, 100396.
- 12 N. Cao, Z. Chen, K. Zang, J. Xu, J. Zhong, J. Luo, X. Xu and G. Zheng, Doping strain induced bi-Ti<sup>3+</sup> pairs for efficient N<sub>2</sub> activation and electrocatalytic fixation, *Nat. Commun.*, 2019, **10**, 2877.



- 13 T. Wu, P. Li, H. Wang, R. Zhao, Q. Zhou, W. Kong, M. Liu, Y. Zhang, X. Sun and F. F. Gong, Biomass-derived oxygen-doped hollow carbon microtubes for electrocatalytic N<sub>2</sub>-to-NH<sub>3</sub> fixation under ambient conditions, *Chem. Commun.*, 2019, **55**, 2684–2687.
- 14 Y. Song, T. Wang, J. Sun, Z. Wang, Y. Luo, L. Zhang, H. Ye and X. Sun, Enhanced electrochemical N<sub>2</sub> reduction to NH<sub>3</sub> on reduced graphene oxide by tannic acid modification, *ACS Sustainable Chem. Eng.*, 2019, **7**, 14368–14372.
- 15 C. Zhao, S. Zhang, M. Han, X. Zhang, Y. Liu, W. Li, C. Chen, G. Wang, H. Zhang and H. Zhao, Ambient electrosynthesis of ammonia on a biomass-derived nitrogen-doped porous carbon electrocatalyst: contribution of pyridinic nitrogen, *ACS Energy Lett.*, 2019, **4**, 377–383.
- 16 L. Xia, X. Wu, Y. Wang, Z. Niu, Q. Liu, T. Li, X. Shi, A. M. Asiri and X. Sun, S-doped carbon nanospheres: an efficient electrocatalyst toward artificial N<sub>2</sub> fixation to NH<sub>3</sub>, *Small Methods*, 2019, **3**, 1800251.
- 17 Y. Gao, Z. Han, S. Hong, T. Wu, X. Li, J. Qiu and Z. Sun, ZIF-67-derived cobalt/nitrogen-doped carbon composites for efficient electrocatalytic N<sub>2</sub> reduction, *ACS Appl. Energy Mater.*, 2019, **2**, 6071–6077.
- 18 P. Song, H. Wang, X. Cao, N. Liu, Q. Wang and R. Wang, Ambient electrochemical N<sub>2</sub> reduction to NH<sub>3</sub> on nitrogen and phosphorus Co-doped porous carbon with trace iron in alkaline electrolytes, *ChemElectroChem*, 2020, **7**, 212–216.
